# Supplementary material
Source: PubMed Central journal article supplement (PMC2975190)
Supplement: supp_M110.128959_SuppFig.pdf [file supp_M110.128959_SuppFig.pdf]

### Supplementary Figure

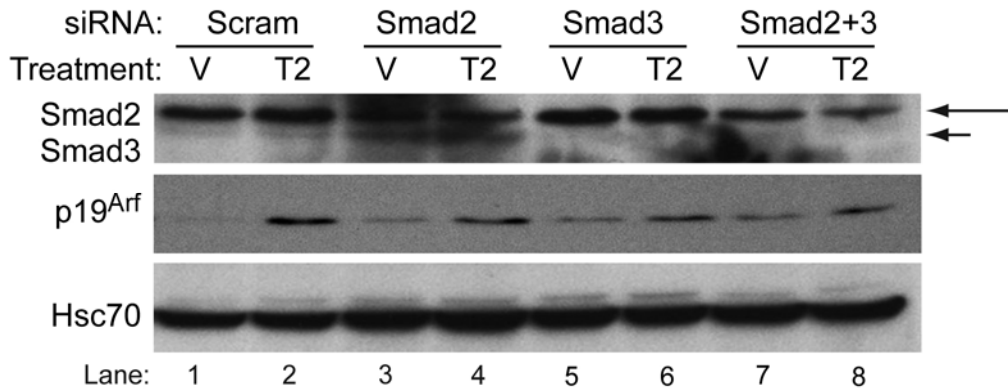

**Legend:** siRNA targeting Smad 2 and 3 impairs Tgf $\beta$ 2 induction of *Arf*. Representative western blots of lysates from wild type MEFs treated with Tgf $\beta$ 2 (T2) or vehicle (V) for 72 hours following transfection with either siRNA control (Scram), or siRNA targeting Smad 2 (long arrow) and/or Smad 3 (short arrow) as indicated. Western blotting confirms partial knock down of Smad 2. (This is a longer exposure of the blot shown in Figure 4A to show Smad 3 knock down.)
